# Supplementary material
Source: PubMed Central journal article supplement (PMC5528954)
Supplement: MOL2-10-282-s001.pdf [file MOL2-10-282-s001.pdf]

**Greystoke et al Supplementary Material**

**Supplementary Material Table 1**

Sequences of mature miRNAs-16 and -21 in Mouse and Human. Downloaded from miRBase Version 21 accessed 20/7/15  
([www.mirbase.org](http://www.mirbase.org))

|       | miR-16                 | miR-21                 |
|-------|------------------------|------------------------|
| Mouse | UAGCAGCACGUAAAUAUUGGCG | UAGCUUAUCAGACUGAUGUUGA |
| Human | UAGCAGCACGUAAAUAUUGGCG | UAGCUUAUCAGACUGAUGUUG  |

## Supplementary Material Table 2

Expression of 65 miRNAs significantly elevated in pooled plasma from 10 SCID-Beige mice bearing s.c. H526 xenografts was compared to plasma pooled from 5 non-tumour bearing animals and analysed in triplicated using Taqman Low Density Arrays Human Pools A and B. Expression in non-tumour bearing NSG mice (n=3 individual mice) also shown. (Levels given as 40-Ct)

|                 | Non Tumour Bearing (SCID) | Non Tumour Bearing (NSG) | H526 Xenografts (SCID) |
|-----------------|---------------------------|--------------------------|------------------------|
| hsa-miR-9#      | 2.1±2                     | 2.3±2.2                  | 18.1±0.2               |
| hsa-miR-22#     | 0.1±0                     | 1±0.9                    | 8.3±0.7                |
| hsa-miR-95      | 0.1±0                     | 0.1±0                    | 15.1±0.3               |
| hsa-miR-182     | 1.4±1.3                   | 0.1±0                    | 10.8±0.3               |
| hsa-miR-183     | 6±1.2                     | 1.8±1.7                  | 13.8±0.2               |
| hsa-miR-183#    | 6.9±1.2                   | 1.1±1                    | 16.8±0.3               |
| hsa-miR-193b    | 12±0.5                    | 10.3±1.3                 | 17.7±0.2               |
| hsa-miR-197     | 8.8±1                     | 0.1±0                    | 18.3±0.3               |
| hsa-miR-345     | 2.1±2                     | 0.1±0                    | 18.1±0.2               |
| hsa-miR-429     | 1.2±1.1                   | 0.1±0                    | 17±0.1                 |
| hsa-miR-660     | 3.3±3.2                   | 0.1±0                    | 16±0.5                 |
| hsa-miR-1224-3P | 0.1±0                     | 0.6±0.5                  | 12±1                   |
| hsa-miR-18a#    | 0.1±0                     | 1.1±1                    | 15±0.2                 |
| hsa-miR-106b#   | 4.2±2.6                   | 2.8±2                    | 13.7±0.7               |
| hsa-miR-335#    | 0.1±0                     | 0.1±0                    | 8.5±0.3                |
| hsa-miR-577     | 0.1±0                     | 0.1±0                    | 13.9±0.2               |
| hsa-miR-590-5p  | 3±1.6                     | 1.9±1.8                  | 16±0.5                 |
| hsa-miR-766     | 0.1±0                     | 0.1±0                    | 12.5±0.3               |
| hsa-miR-15a#    | 0.1±0                     | 1.1±1                    | 10.2±0.1               |

|                |         |         |          |
|----------------|---------|---------|----------|
| hsa-miR-25#    | 0.1±0   | 3±1.8   | 12±0.6   |
| hsa-miR-28-3p  | 2.6±2.5 | 0.1±0   | 12.1±0.3 |
| hsa-miR-136#   | 0.1±0   | 1.9±1.8 | 6.9±0.6  |
| hsa-miR-502-3p | 0.1±0   | 0.1±0   | 11.1±0.8 |
| hsa-miR-509    | 1±0.9   | 6.4±3.2 | 10.7±0.5 |
| hsa-miR-598    | 4.7±4.6 | 11.1±3  | 17.7±0.3 |
| hsa-miR-636    | 2.1±2   | 2.2±2.1 | 12.3±0.5 |
| hsa-miR-663B   | 0.1±0   | 0.1±0   | 11.6±0.4 |
| hsa-miR-769-5p | 0.1±0   | 0.1±0   | 8.4±0.4  |
| hsa-miR-885-5p | 0.1±0   | 0.1±0   | 16.6±0.2 |
| hsa-miR-1227   | 0.1±0   | 5±2.9   | 14.3±0.4 |
| hsa-miR-1271   | 0.1±0   | 0.1±0   | 13±0.4   |
| hsa-miR-16-1#  | 0.1±0   | 0.1±0   | 9.8±0.5  |
| hsa-miR-135a   | 0.1±0   | 0.1±0   | 7±0.3    |
| hsa-miR-191#   | 0.1±0   | 2±1.4   | 9.2±0.4  |
| hsa-miR-216b   | 2.8±2.7 | 0.1±0   | 11.8±0.1 |
| hsa-miR-301b   | 7.4±0.4 | 6.1±3.1 | 15.5±0.2 |
| hsa-miR-330    | 0.1±0   | 2.5±2.4 | 8.6±1.1  |
| hsa-miR-362-3p | 0.1±0   | 2.7±2.6 | 11.3±0.6 |
| hsa-miR-625#   | 4.7±1   | 9±1.6   | 15.2±0.1 |
| hsa-miR-628-3p | 0.1±0   | 4.7±4.6 | 11.6±0.4 |
| hsa-miR-1180   | 0.1±0   | 5.5±2.7 | 13±1.9   |
| hsa-miR-1236   | 0.1±0   | 0.8±0.7 | 10.4±1.1 |
| hsa-miR-1288   | 0.1±0   | 3.6±3.5 | 13±1.8   |
| hsa-miR-33b    | 6.9±0.8 | 2.8±2.7 | 14.1±0.3 |
| hsa-miR-501-3p | 0.1±0   | 0.1±0   | 9.8±0.4  |

|                |         |         |          |
|----------------|---------|---------|----------|
| hsa-miR-941    | 0.1±0   | 0.1±0   | 7.8±0.4  |
| hsa-miR-1226#  | 0.1±0   | 2.2±1.1 | 10.1±1.4 |
| hsa-miR-1249   | 1.5±1.4 | 7.8±4.1 | 12.6±4.8 |
| hsa-miR-1254   | 0.1±0   | 0.1±0   | 9.5±0.7  |
| hsa-miR-1269   | 0.1±0   | 1.6±0.8 | 10.6±0.5 |
| hsa-miR-7-2#   | 0.1±0   | 1.1±1   | 9.8±0.3  |
| hsa-miR-20a#   | 0.1±0   | 1.2±1.1 | 8.8±0.5  |
| hsa-miR-217    | 0.1±0   | 3.7±3.6 | 7.5±0.2  |
| hsa-miR-454#   | 0.1±0   | 0.1±0   | 9.3±0.2  |
| hsa-miR-507    | 0.1±0   | 0.1±0   | 7.2±0.1  |
| hsa-miR-550    | 0.1±0   | 0.1±0   | 5.3±0.5  |
| hsa-miR-576-3p | 1.1±1   | 1.9±1.8 | 12±1.1   |
| hsa-miR-579    | 1.5±1.4 | 0.1±0   | 11.5±0.6 |
| hsa-miR-1233   | 1.1±1   | 2.9±2.8 | 9.5±0.2  |
| hsa-miR-1278   | 0.1±0   | 8.2±4.9 | 12.2±6.1 |
| hsa-miR-570    | 0.1±0   | 2.5±2.4 | 7.8±0.6  |
| hsa-miR-767-5p | 0.1±0   | 0.1±0   | 9.5±0.4  |
| hsa-miR-1248   | 2.2±2.1 | 7.4±2.1 | 12.6±2.5 |
| hsa-miR-1252   | 0.1±0   | 12±2.5  | 18.1±2.8 |
| hsa-miR-1292   | 0.1±0   | 0.7±0.6 | 8.2±1.7  |

**Supplementary Material Table 3.** Summary of literature reporting deregulated miRNAs in SCLC. Papers identified from PubMed using search criteria of SCLC and miRNA on 1/09/13.

| 1st Author | Pubmed ID | Model         | Number of samples assessed                      | Number of MiRNAs evaluated      | Up-regulated                                                                                                                                                                                                                                                                        | Down-regulated                                                                                                                                                  |
|------------|-----------|---------------|-------------------------------------------------|---------------------------------|-------------------------------------------------------------------------------------------------------------------------------------------------------------------------------------------------------------------------------------------------------------------------------------|-----------------------------------------------------------------------------------------------------------------------------------------------------------------|
| Du         | 20624269  | Cell Lines    | 9 (cf to 7 NSCLC and 3 immortalized cell lines) | 136                             | miR-338<br>miR-101<br>miR-98<br>miR-106b<br>miR-17-5p<br>miR-96<br>miR-15a<br>miR-92<br>miR-326<br>miR-1<br>miR-15b<br>miR-195<br>miR-103<br>miR-135<br>miR-301<br>miR-328<br>miR-93<br>miR-16<br>miR-324-5p<br>miR-107<br>miR-149<br>miR-181c<br>miR-148b<br>miR-142-3p<br>miR-30c | miR-199a*<br>miR-27a<br>miR-23b<br>miR-222<br>miR-221<br>miR-99a<br>miR-24<br>miR-29c<br>miR-23a<br>miR-205<br>miR-29b<br>miR-29a<br>miR-22<br>miR-21<br>miR-31 |
| Lee        | 21731696  | Human Tumours | 31                                              | 7 (21,29b,34a, 34c,155, let-7a) |                                                                                                                                                                                                                                                                                     |                                                                                                                                                                 |

|          |          | Cell Lines    | 14 (cf to 26 NSCLC) |                                     |                                                                                                                                                                                                                                                                                                                               |                                                                                                                                                                                                                                                                                                                                                      |
|----------|----------|---------------|---------------------|-------------------------------------|-------------------------------------------------------------------------------------------------------------------------------------------------------------------------------------------------------------------------------------------------------------------------------------------------------------------------------|------------------------------------------------------------------------------------------------------------------------------------------------------------------------------------------------------------------------------------------------------------------------------------------------------------------------------------------------------|
| Voortman | 20615970 | Human Tumours | 33                  | altered copy number across spectrum |                                                                                                                                                                                                                                                                                                                               |                                                                                                                                                                                                                                                                                                                                                      |
|          |          | Cell Lines    | 13                  |                                     |                                                                                                                                                                                                                                                                                                                               |                                                                                                                                                                                                                                                                                                                                                      |
| Miko     | 19895320 | Cell Lines    | 3                   | 319                                 | miR-200b<br>miR-200a<br>miR-429<br>miR-10b<br>miR-128a<br>miR-375<br>miR-128b<br>miR-95<br>miR-206<br>miR-25<br>miR-93<br>miR-106b<br>miR-182<br>miR-96<br>miR-183<br>miR-335<br>miR-200c<br>miR-141<br>miR-17-5p<br>miR-18a<br>miR-19a<br>miR-20a<br>miR-19b-1,2<br>miR-92-1,2<br>miR-494<br>miR-301<br>miR-181c<br>miR-181d | miR-34a<br>miR-214<br>miR-199a2<br>miR-135b<br>miR-29c<br>miR-29b-2,1<br>miR-302c<br>miR-143<br>miR-145<br>miR-146a<br>miR-133b<br>miR-490<br>miR-29a<br>miR-29b-1,2<br>miR-32<br>miR-199b<br>miR-126<br>miR-511-1,2<br>miR-125b<br>miR-100<br>miR-190<br>miR-497<br>miR-451<br>miR-142-3,p<br>miR-142-5,p<br>miR-338<br>miR-150<br>miR-512/373 (30) |

|               |                 |    |  |             |                 |
|---------------|-----------------|----|--|-------------|-----------------|
|               |                 |    |  | miR-130b    | different ones) |
|               |                 |    |  | miR-374     | miR-296         |
|               |                 |    |  | miR-363     | miR-155         |
|               |                 |    |  | miR-92-2,1  | miR-33          |
|               |                 |    |  | miR-19b-2,1 | miR-502         |
|               |                 |    |  | miR-20b     | miR-223         |
|               |                 |    |  | miR-18b     | miR-222         |
|               |                 |    |  | miR-106a    | miR-325         |
|               |                 |    |  | miR-9-1,2   | miR-506         |
|               |                 |    |  | miR-7-1,2,3 | miR-514-1,2,3   |
|               |                 |    |  |             | miR-224         |
| Human Tumours | 6 Pooled)       | 62 |  | miR-17-5p   | miR-29a         |
|               |                 |    |  | miR-301     | miR-125a        |
|               |                 |    |  | miR-98      | miR-199a        |
|               |                 |    |  | miR-106a    | miR-214         |
|               |                 |    |  | miR-335     | miR-223         |
|               |                 |    |  | miR-95      | miR-126         |
|               |                 |    |  | miR-19a     | miR-150         |
|               |                 |    |  | miR-374     | miR-27a         |
|               |                 |    |  | miR-96      |                 |
|               |                 |    |  | miR-200a    |                 |
|               |                 |    |  | miR-182     |                 |
|               |                 |    |  | miR-25      |                 |
|               |                 |    |  | miR-210     |                 |
|               |                 |    |  | miR-183     |                 |
|               |                 |    |  | miR-105     |                 |
|               |                 |    |  | miR-200c    |                 |
| Human Tumours | 17 (individual) | 15 |  | miR-301     | miR-126         |
|               |                 |    |  | miR-183     | miR-150         |
|               |                 |    |  | miR-106a    | miR-222         |

|           |          |               |                                                           |      |                                                                           |                                                                            |
|-----------|----------|---------------|-----------------------------------------------------------|------|---------------------------------------------------------------------------|----------------------------------------------------------------------------|
|           |          |               |                                                           |      | miR-25<br>miR-95                                                          | miR-223                                                                    |
| Hayashita | 16266980 | Cell lines    | 19 (mix of SCLC and NSCLC)                                | 21   | miR-17-92 cluster<br>miR-19a<br>miR-20<br>miR-18<br>miR-17-3p             |                                                                            |
| Miao      | 23117485 | Cell Lines    | 3 (sphere forming colonies vs. not)                       | 1212 |                                                                           | miR-27-a                                                                   |
| Tanaka    | 22047961 | Cell Lines    | 11                                                        |      | methylation of miR-34b/c                                                  |                                                                            |
|           |          | Human Tumours | 27                                                        |      | methylation of miR-34b/c                                                  |                                                                            |
| Zhao      | 22172490 | Cell Lines    | 1                                                         |      | miR-375                                                                   |                                                                            |
| Guo       | 20371173 | Cell Lines    | 1 (paired drug resistant and parental)                    | 856  | miR-224<br>miR-143<br>miR-145<br>miR-100<br>miR-99a<br>miR-214<br>miR-29a | miR-375<br>miR-200b<br>miR-335<br>miR-217<br>miR-379<br>miR-495<br>miR-134 |
| Ranade    | 20548249 | Human Tumours | 34                                                        | 880  | miR-92a-2*<br>miR-147<br>miR-574-5p                                       |                                                                            |
| Roth      | 22675530 | Serum         | 8 (mixed in with 19 NSCLC; separate results not reported) | 4    | miR-10b<br><br>miR-34a<br>miR-141<br>miR-155                              |                                                                            |
| Salim     | 22929890 | Cell Lines    | 5 (radio resistant vs                                     | 7815 | miR-324-5p                                                                |                                                                            |



radiosensitive)

miR-1227  
miR-625  
miR-423-3p  
miR-1249

**Supplementary Material Table 4.** *Individual levels of the 10 circulating miRNAs used in Figure 4.*

Individual levels of the 10 circulating miRNAs of interest in 200 µl plasma across different cancer sub-types; patients prior to therapy with SCLC (n=12), NSCLC (n=15), by treatment state in CRC; patients following resection for stage 3 cancer (n=7) compared to patients with colorectal cancer prior to and following 6 weeks of cytotoxic chemotherapy (n=24), pancreas cancer (n=26) compared to healthy volunteers (n=11).

|          | Healthy Volunteers | SCLC (Limited Stage) | SCLC (Extensive Stage) | CRC (early stage) | CRC (pre chemotherapy) | CRC (post chemotherapy) | Pancreatic cancer |
|----------|--------------------|----------------------|------------------------|-------------------|------------------------|-------------------------|-------------------|
| miR-200a | 0.4±0.3            | 3.45±1.94            | 9.66±1.33              | 0.94±0.65         | 7.43±0.67              | 4.75±0.65               | 8.3±0.66          |
| miR-200b | 1.81±0.81          | 2.97±1.87            | 10.56±1.02             | 7.59±0.66         | 11.42±0.44             | 10.22±0.42              | 8.31±0.63         |
| miR-200c | 3.51±1.22          | 6.83±2.24            | 11.11±0.65             | 10.91±0.48        | 12.36±0.33             | 11.58±0.33              | 9.71±0.59         |
| miR-141  | 0.1±0              | 4.59±2.61            | 8.25±1.18              | 6±0.67            | 7.62±0.72              | 6.23±0.66               | 8.36±0.64         |
| miR-429  | 2.21±1.09          | 2.48±2.38            | 8.65±1.31              | 4.46±1.18         | 5.97±0.71              | 3.82±0.66               | 6.24±0.68         |
| miR-95   | 4.01±1.37          | 2.4±2.3              | 9.11±1.14              | 8.83±0.69         | 9.11±0.26              | 9.24±0.24               | 5.78±0.39         |
| miR-195  | 8.49±0.69          | 12.1±1.16            | 12.53±0.52             | 11.27±0.56        | 16.4±0.25              | 16.11±0.15              | 16.09±0.44        |

|         |            |            |            |            |            |            |            |
|---------|------------|------------|------------|------------|------------|------------|------------|
| miR-210 | 3.82±1.12  | 10.13±1.79 | 12.41±0.55 | 11.71±0.22 | 12.27±0.32 | 11.36±0.23 | 11.45±0.49 |
| miR-335 | 0.65±0.39  | 1.83±1.73  | 6.59±0.78  | 10.76±0.33 | 8.51±0.54  | 7.17±0.7   | 10.17±0.5  |
| miR-375 | 10.46±1.15 | 15.54±1.04 | 17.56±0.53 | 13.01±0.39 | 14.38±0.29 | 13.64±0.19 | 8.59±0.33  |

## Supplementary Material Figure Titles and Legends

**Supplemental Figure 1.** *Final workflow for Taqman Low Density Arrays analysis of clinical samples*

**Supplemental Figure 2.** *Principle component analysis of mouse plasma miRNAs.* The circulating levels of 754 miRNAs in 10  $\mu$ l of plasma comparing non tumour bearing NOD scid gamma (NSG) mice (n=3) compared to NSG mice bearing cell line xenografts (n=2) or CTC explants (n=4). miRNA levels assessed using Taqman Low Density Arrays (Human Pool A and B) and normalised to global expression of miRNA.

**Supplemental Figure 3.** *Rationale for choosing the 10 miRNAs for inclusion in qRT-PCR panel.* miRNAs of interest were identified in clinical and pre-clinical models and previously reported as up-regulated in SCLC tumours or cell-lines.

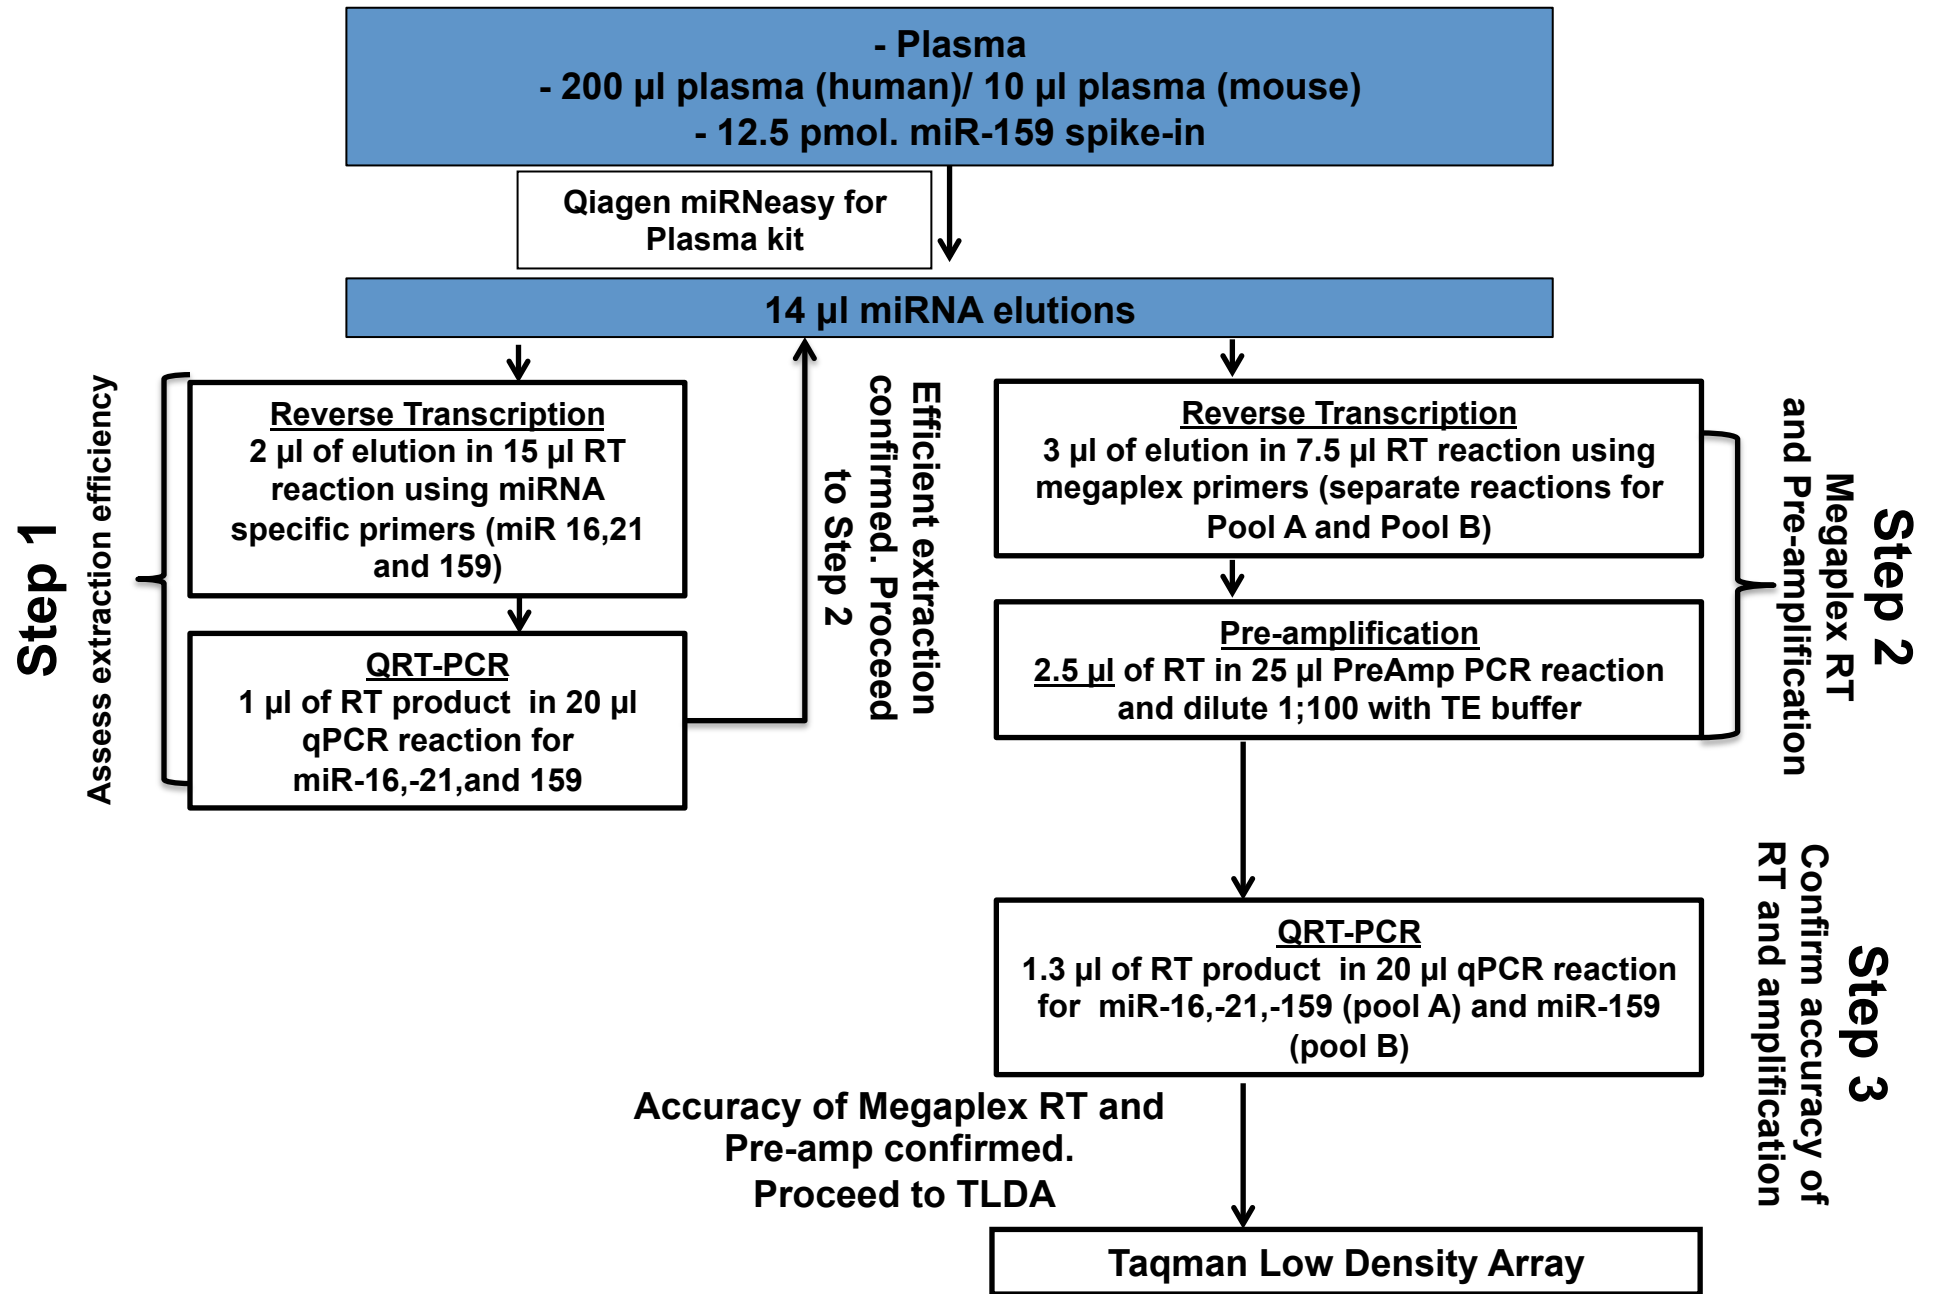

Supplemental Figure 1

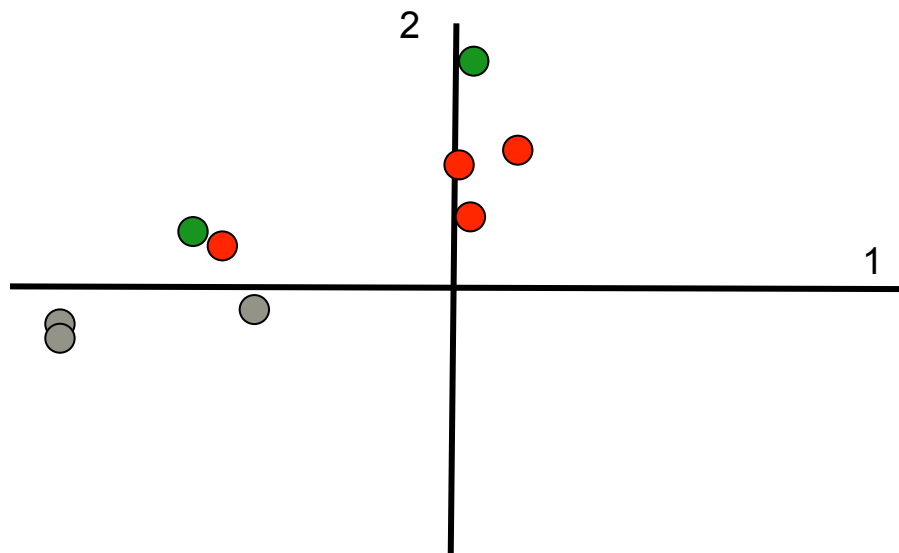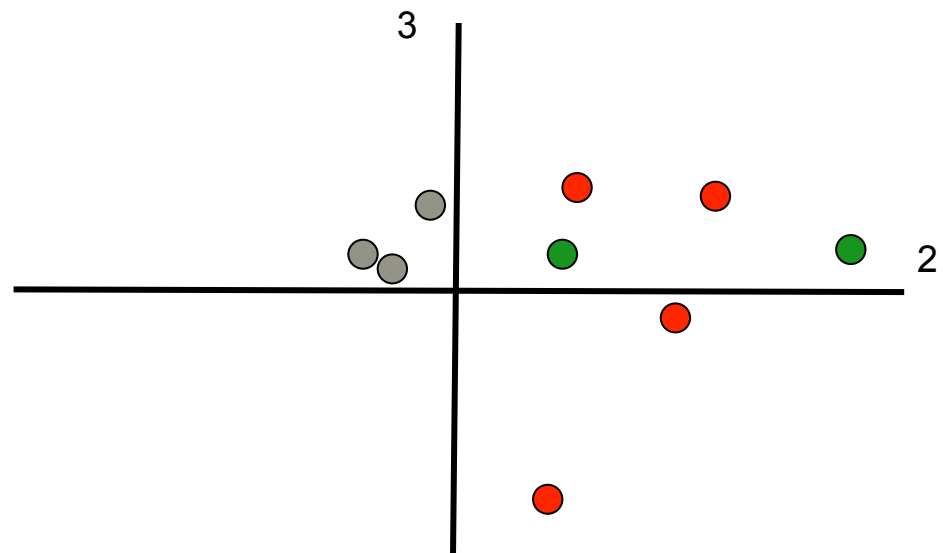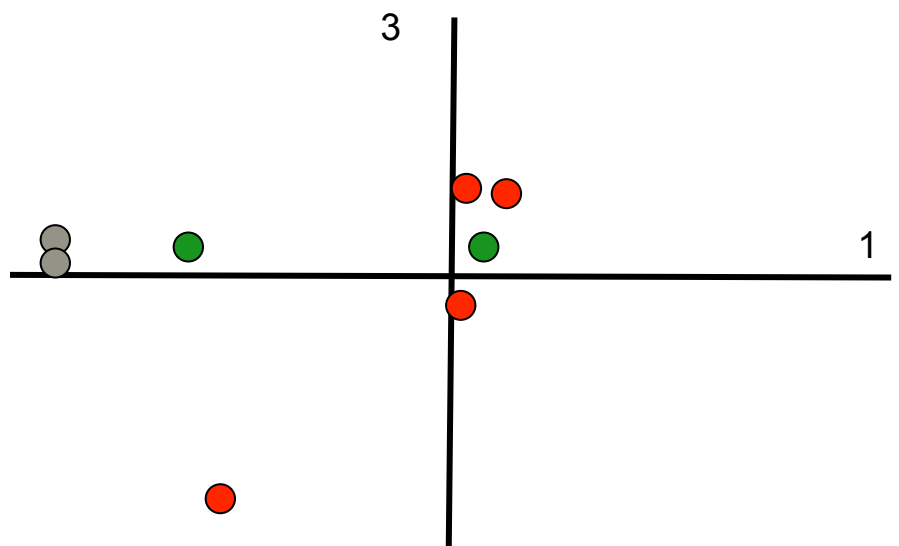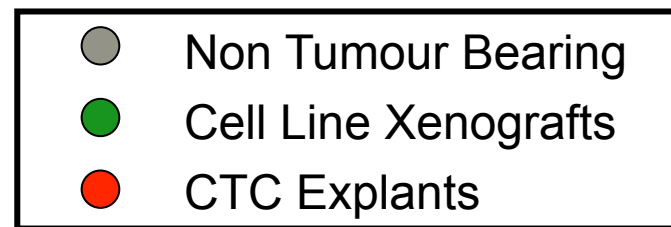

Supplemental  
Figure 2

### Circulating miRNAs that correlated with Stage in Patients with SCLC (i.e. ED>LD>HNV)

miR-9#  
miR-26b#  
miR-29c  
miR-34b  
miR-141  
miR-182#  
miR-195  
miR-200a  
miR-200b  
miR-200c  
miR-210  
miR-362-3p  
miR-410  
miR-431#  
miR-453  
miR-486-3p  
miR-518d  
miR-519a  
miR-542- 5p  
miR-592  
miR-625#  
miR-874  
miR-1244  
miR-1274

### Circulating miRNAs elevated in CTC Derived Explants vs. Non- Tumour Bearing animal

miR-802  
miR-28  
miR-1224-3p  
miR-96  
miR-95  
miR-429  
miR-182  
miR-345  
miR-660

miR-183#  
miR-335#  
miR-197  
miR-375  
miR-1290

Previously reported as elevated in SCLC tumours or cell lines

More predominant miRNA from opposite arm of precursor reported as elevated in SCLC tumours or cell lines

Underlined miRNAs were chosen for SCLC tumour miRNA 10-plex

Supplemental  
Figure 3
